# Supplementary material for: Temporal Dynamics and Interrelations of Cytokines, Neutrophil Proteins, Exudation, and Bacterial Colonization in Epidermal Wound Healing
Source: bioRxiv or medRxiv preprint supplement (doi:10.1101/2023.12.07.23299659), 2025-03-22
Supplement: Supplementary file [file media-1.pdf]

**Supplemental table 1.** Median bacterial levels in swab and dressing fluid samples per day.

IQR = interquartile range, CI = confidence interval

|                       | <b>Total CFU<br/>(median)</b> | <b>IQR</b>            | <b>95% CI</b>          | <b>CFU/mL<br/>(median)</b> | <b>CFU/cm<sup>2</sup><br/>(median)</b> |
|-----------------------|-------------------------------|-----------------------|------------------------|----------------------------|----------------------------------------|
| <i>Swab</i>           |                               |                       |                        |                            |                                        |
| Day 1                 | 0                             | 0 – 0                 | 0 – 0                  | 0                          | 0                                      |
| Day 2                 | 2871                          | 56 – 13208            | 325 – 6667             | 5742                       | 7460                                   |
| Day 3                 | 99167                         | 9438 – 610417         | 24250 – 349167         | 198334                     | 257680                                 |
| Day 5                 | 1054167                       | 302083 – 3095834      | 633333 – 1633333       | 2108334                    | 2739198                                |
| Day 8                 | 1683334                       | 381250 – 6083334      | 1033333 – 2650000      | 3366667                    | 4374055                                |
| Day 11                | 1266667                       | 445833 – 2787500      | 675000 – 2258333       | 2533333                    | 3291367                                |
| <i>Dressing fluid</i> |                               |                       |                        |                            |                                        |
| Day 2                 | 19312                         | 6059 – 61730          | 9357 – 32949           | 8334                       | 1042                                   |
| Day 3                 | 1376674                       | 314503 – 4283475      | 525549 – 3208660       | 601667                     | 75208                                  |
| Day 5                 | 20919514                      | 4262095 –<br>44895112 | 11002813 –<br>33066067 | 9583333                    | 1197917                                |
| Day 8                 | 15667359                      | 5275483 –<br>33595317 | 7727250 –<br>24064900  | 7583333                    | 947917                                 |
| Day 11                | 1430953                       | 580890 – 3176400      | 854608 – 2172555       | 691667                     | 86458                                  |

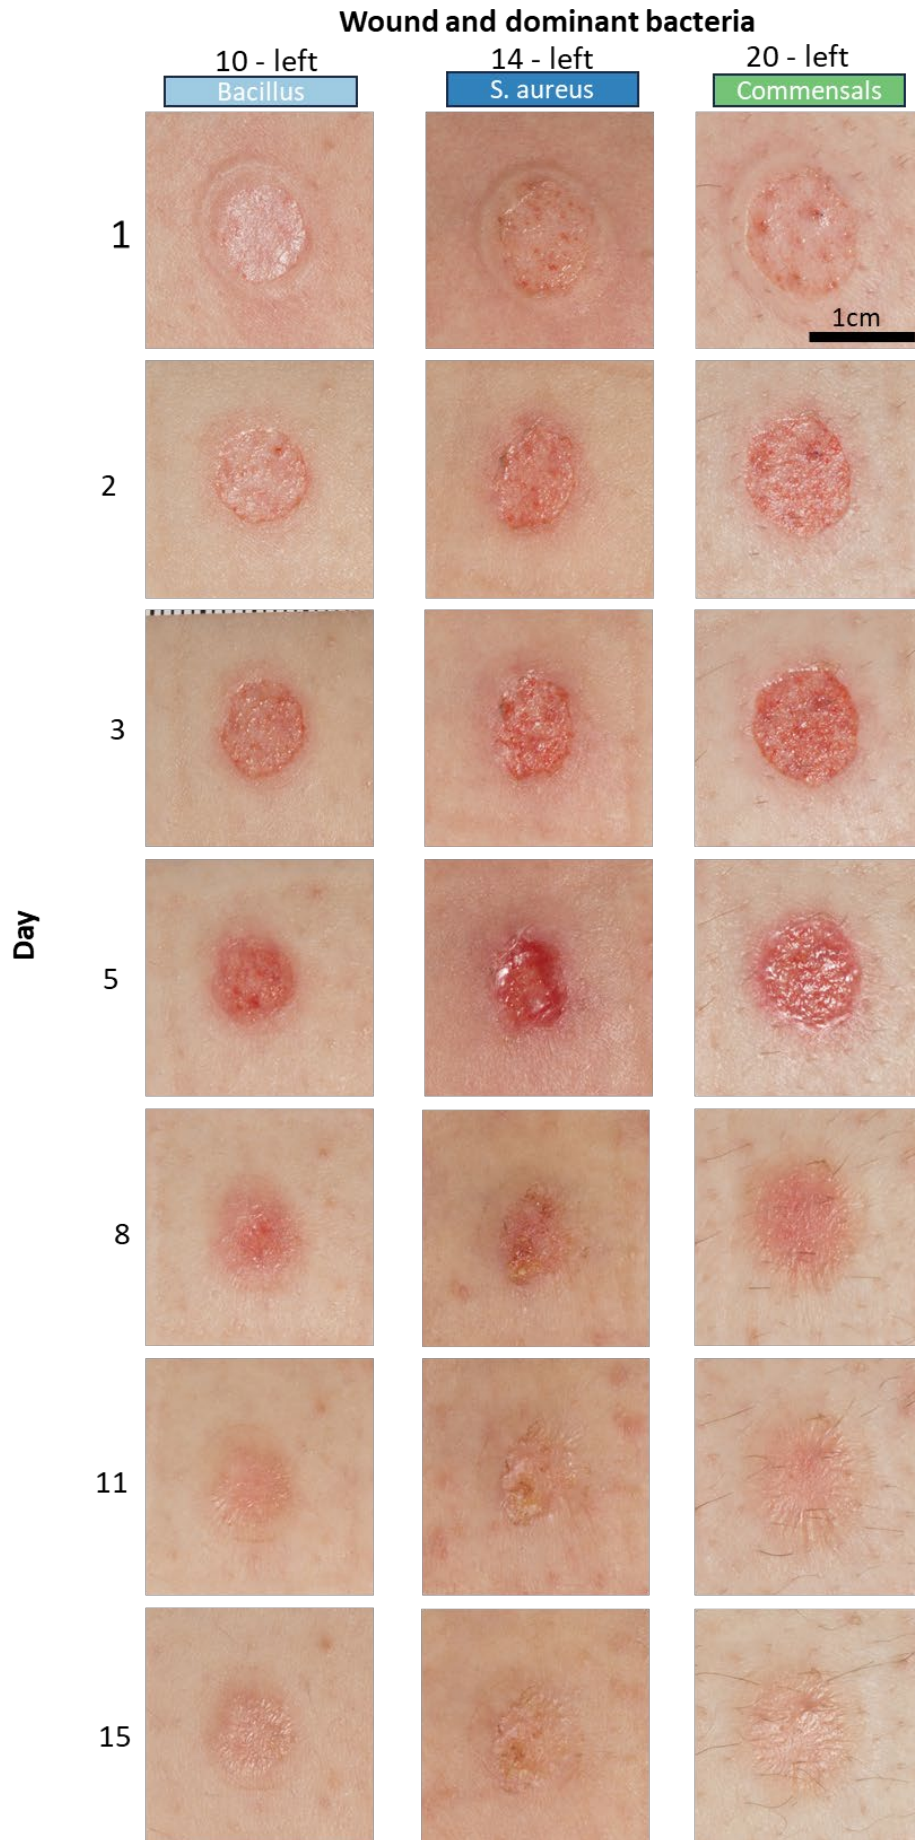

**Supplemental figure 1.** Images of three wounds taken over time that had different dominant bacterial strains detected by MALDI-TOF MS (left: *Bacillus* sp.; middle: *S. aureus*; right: various commensals).

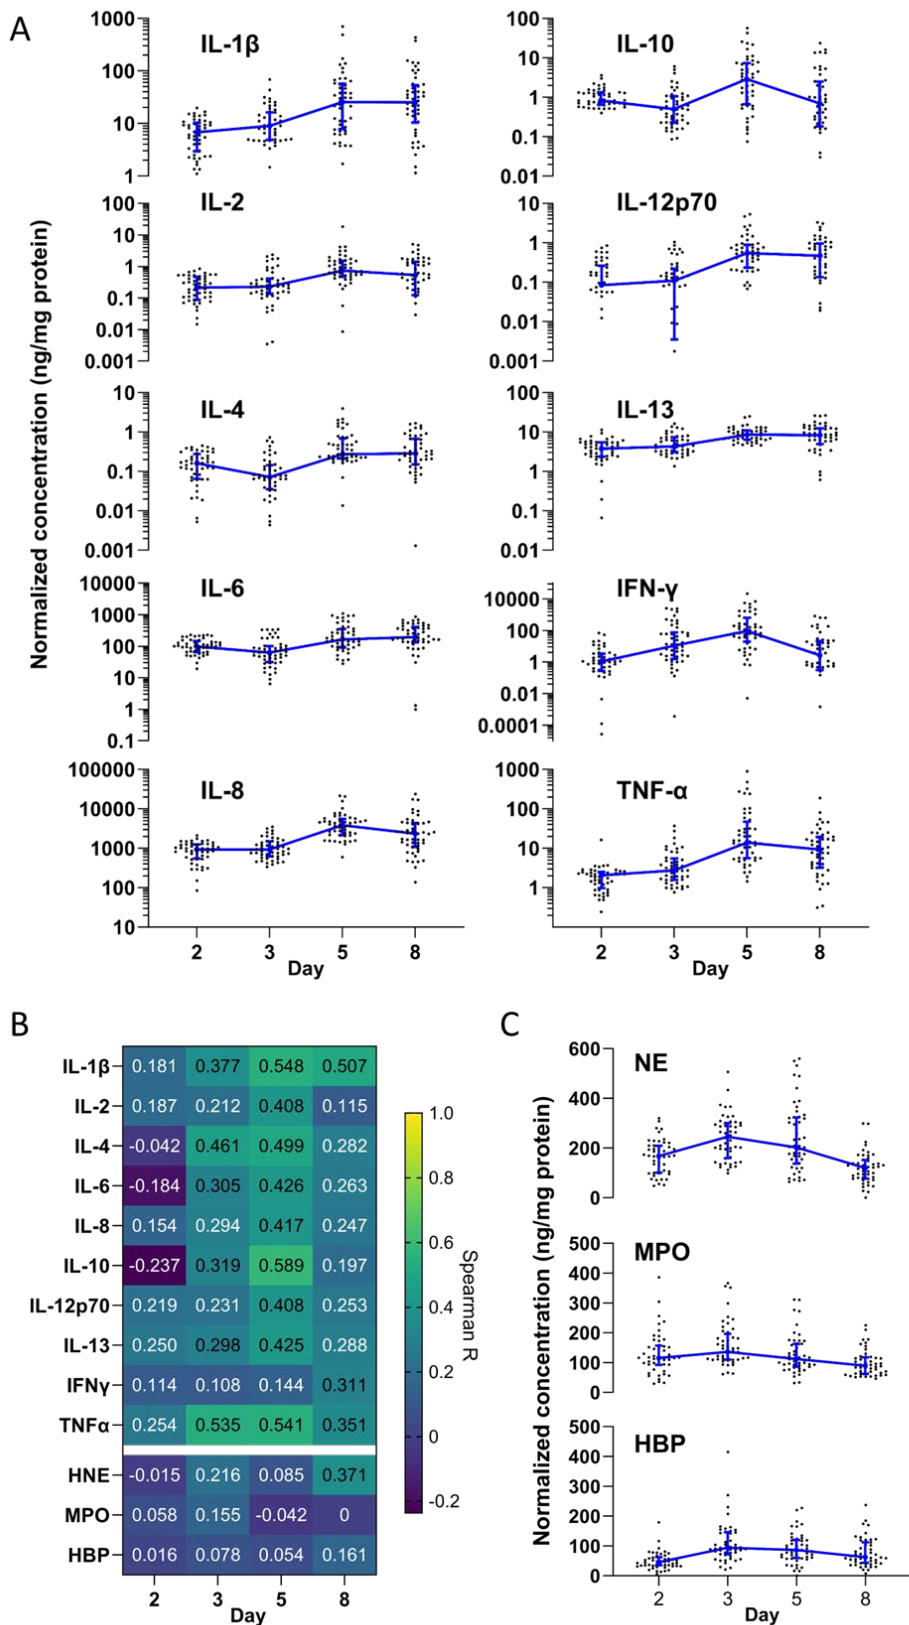

**Supplemental figure 2.** A) Levels of each cytokine measured in dressing fluid over time normalized for protein content. Each data point is the wound fluid cytokine concentration in a single wound, while the blue line is the median of all wounds that day (n=48), and whiskers are the interquartile range. B) Spearman correlation coefficients comparing normalized (for protein content) levels of each cytokine and neutrophil protein with bacterial counts in swabs. C) Levels of three neutrophil proteins measured in dressing fluid over time normalized for protein content. Each data point is the wound fluid concentration in a single wound, while the blue line is the median of all wounds that day (n=48), and whiskers are the interquartile range.
